# Supplementary material for: Effects of Mental Health on the Costs of Care for Chronic Illnesses
Source: Atypon-hosted journal article supplement (doi:10.1176/appi.ps.201900098), 2019-08-05
Supplement: appi.ps.201900098.ds001.pdf [file appi.ps.201900098.ds001.pdf]

## Costs of Chronic Conditions with Comorbid Depression

## Supplemental Table 1

Reanalysis Using Both Natural and Log 10 Units for Cost. Values in Cells are F ratios for the interaction terms. Statistically significant effects are indicated with asterisks.

| Condition              | Natural Unites | Log Units   |
|------------------------|----------------|-------------|
| Coronary Heart Disease | 1.14           | 4.56        |
| Diabetes               | 6.57***        | 1.39        |
| Asthma                 | .77<br>=.46    | .79<br>=.45 |
| Arthritis              | 1.88           | 10.92***    |
| COPD                   | 2.47           | .90         |
| High Cholesterol       | .679           | 8.62***     |
| Cancer                 | 10.36***       | 4.09*       |
| Stroke                 | .62            | 1.33        |

\*\*\* p<.001

\*\* p<.01

\* p<.01

Costs of Chronic Conditions with Comorbid Depression

Supplemental Table 2

Reanalysis of Interaction Effects Using Both Natural and Log 10 Units for Cost Without Adjustment for PCS. Values in Cells are F ratios for the interaction terms. Statistically significant effects are indicated with asterisks

| Condition              | Natural Unites | Log Units |
|------------------------|----------------|-----------|
| Coronary Heart Disease | 2.31           | 1.72      |
| •<br>Diabetes          | 9.68***        | .691      |
| Asthma                 | 1.02           | .39       |
| Arthritis              | 7.40***        | 4.68**    |
| COPD                   | 1.63           | .27       |
| High Cholesterol       | 2.63           | 2.49      |
| Cancer                 | 15.66***       | .45       |
| Stroke                 | 1.32           | .57       |

\*\*\* p<-.001  
 \*\* p<.01  
 \* p<.01

Costs of Chronic Conditions with Comorbid Depression

Supplemental Table 3:

Summary of Multiple Regression for Depression by Chronic Condition with Mental Health (SF-12 MCS Score) as a Continuous Variable and with Adjustment for SF-12 Physical Health Component Score.

| <b>Condition</b>       | <b>N DX<br/>NoDX*</b> | <b>Condition<br/>Effect</b> | <b>MH Effect†</b> | <b>Interaction<br/>Effect</b> | <b>PCS‡</b>    |
|------------------------|-----------------------|-----------------------------|-------------------|-------------------------------|----------------|
| Coronary Heart Disease | 1,105<br>20,240       | 3.56 (<.001)                | 1.93 (= .054)     | .357 (= .72)                  | -38.13 (<.001) |
| Diabetes               | 2,389<br>18,889       | 6.90 (.001)                 | 6.68 (.001)       | 4.53 (= .001)                 | 38.73 (<.001)  |
| Asthma                 | 2,061<br>19,216       | .73 (= .46)                 | 6.68 (<.001)      | .75 (= .94)                   | 42.54 (<.001)  |
| Arthritis              | 5,522<br>15,754       | 3.02 (<.001)                | 5.33 (<.001)      | 2.20 (= .03)                  | 34.08 (<.001)  |
| COPD§                  | 405<br>20,943         | 4.83 (<.001)                | 4.88 (<.001)      | 3.87 (= .001)                 | 41.88 (<.001)  |
| High Cholesterol       | 6,460<br>14813        | 3.02 (<.001)                | 4.53 (<.001)      | .112 (= .92)                  | 38.62 (<.001)  |
| Cancer                 | 1,924<br>19,351       | 7.18 (<.001)                | 6.09 (<.001)      | 4.13 (<.001)                  | 39.34 (<.001)  |
| Stroke                 | 883<br>20465          | 4.88 (<.001)                | 2.60 (= .10)      | 1.12 (= .224)                 | 38.84 (<.001)  |

Note for the interpretation of supplemental table 3. The values in the cells are T statistics yielded by the multiple regression. These values differ in magnitude from the F statistics offered in Table 1. For reference, t is the square root of F.

Costs of Chronic Conditions with Comorbid Depression

Supplemental Table 4

Reanalysis of Interaction Effects With Total Expense Values Truncated at \$10,000. Values in Cells are F ratios for the interaction terms. Statistically significant effects are indicated with asterisks

| Condition              | F statistic for Interaction |
|------------------------|-----------------------------|
| Coronary Heart Disease | 8.36***                     |
| •<br>Diabetes          | 1.86                        |
| Asthma                 | .85                         |
| Arthritis              | 7.36***                     |
| COPD                   | 2.01                        |
| High Cholesterol       | 6.06**                      |
| Cancer                 | 6.12**                      |
| Stroke                 | .57                         |

\*\*\* p<.001  
 \*\* p<.01  
 \* p<.01
